# Supplementary material
Source: PubMed Central journal article supplement (PMC4457465)
Supplement: NIHMS690267-supplement-supplemental_table_III.pdf [file NIHMS690267-supplement-supplemental_table_III.pdf]

Table III: Phospholipid content of each class shown by their molecular species, indicate the diacyl comp

| <b>Phospholipid (nmol/g FW)</b> | <b>IC-Vehicle</b> | <b>stdev</b> | <b>IC-NAE 16:0</b> | <b>stdev</b> | <b>II-Vehicle</b> |
|---------------------------------|-------------------|--------------|--------------------|--------------|-------------------|
| LysoPC 16:1                     | 0.2               | 0.1          | 0.2                | 0.2          | 0.7               |
| LysoPC 16:0                     | 48.9              | 7.4          | 43.8               | 8.7          | 84.0              |
| LysoPC 18:3                     | 0.0               | 0.0          | 0.0                | 0.0          | 0.0               |
| LysoPC 18:2                     | 1.1               | 0.2          | 1.0                | 0.4          | 1.4               |
| LysoPC 18:1                     | 23.6              | 5.7          | 19.8               | 4.1          | 32.9              |
| LysoPC 18:0                     | 21.7              | 2.3          | 19.8               | 4.7          | 36.8              |
| LysoPC 20:5                     | 0.0               | 0.0          | 0.0                | 0.0          | 0.1               |
| LysoPC 20:4                     | 4.2               | 1.3          | 3.6                | 0.9          | 6.1               |
| LysoPC 20:3                     | 0.1               | 0.1          | 0.0                | 0.0          | 0.1               |
| LysoPC 20:2                     | 0.0               | 0.0          | 0.1                | 0.1          | 0.2               |
| LysoPC 20:1                     | 1.1               | 0.2          | 0.9                | 0.2          | 1.4               |
| LysoPC 20:0                     | 0.2               | 0.1          | 0.2                | 0.1          | 0.4               |
| LysoPC 22:6                     | 3.2               | 1.7          | 2.4                | 0.8          | 4.8               |
| LysoPC 22:5                     | 0.1               | 0.1          | 0.0                | 0.1          | 0.1               |
| <b>Total LysoPC</b>             | <b>104.4</b>      | <b>17.9</b>  | <b>91.9</b>        | <b>19.4</b>  | <b>169.0</b>      |
|                                 |                   |              |                    |              |                   |
| PC 28:1                         | 0.2               | 0.1          | 0.2                | 0.1          | 0.3               |
| PC 30:0                         | 31.0              | 2.4          | 29.1               | 6.1          | 25.2              |
| PC 32:1                         | 65.6              | 8.4          | 62.0               | 8.5          | 58.1              |
| PC 32:0                         | 1333.8            | 65.3         | 1238.6             | 191.9        | 1125.8            |
| PC 34:4                         | 0.5               | 0.1          | 0.4                | 0.1          | 0.5               |
| PC 34:3                         | 1.8               | 0.7          | 1.7                | 0.2          | 1.9               |
| PC 34:2                         | 103.8             | 17.0         | 97.1               | 11.4         | 90.2              |
| PC 34:1                         | 1736.7            | 80.2         | 1637.0             | 204.0        | 1466.1            |
| PC 34:0                         | 200.7             | 15.2         | 179.6              | 35.0         | 180.5             |
| PC 36:6                         | 0.6               | 0.3          | 0.6                | 0.3          | 0.8               |
| PC 36:5                         | 2.5               | 0.3          | 2.2                | 0.4          | 2.0               |
| PC 36:4                         | 404.0             | 25.0         | 379.7              | 61.5         | 336.0             |
| PC 36:3                         | 6.7               | 2.8          | 6.5                | 1.1          | 5.7               |
| PC 36:2                         | 177.3             | 28.0         | 175.7              | 17.1         | 160.9             |
| PC 36:1                         | 753.6             | 87.2         | 702.4              | 62.1         | 662.0             |
| PC 38:6                         | 253.5             | 21.4         | 255.5              | 45.5         | 220.7             |
| PC 38:5                         | 75.4              | 5.7          | 73.5               | 14.4         | 60.5              |
| PC 38:4                         | 341.9             | 25.1         | 332.4              | 54.2         | 289.6             |
| PC 38:3                         | 0.0               | 0.0          | 1.7                | 2.2          | 1.7               |
| PC 38:2                         | 10.6              | 2.9          | 13.2               | 3.1          | 12.4              |
| PC 38:1                         | 18.3              | 3.5          | 18.1               | 3.0          | 17.9              |
| PC 38:0 (or ePC 40:7)           | 13.6              | 3.9          | 12.9               | 3.3          | 13.8              |
| PC 40:8                         | 5.4               | 1.2          | 5.7                | 1.2          | 5.5               |

|                 |               |              |               |              |               |
|-----------------|---------------|--------------|---------------|--------------|---------------|
| PC 40:7         | 51.2          | 2.3          | 50.6          | 10.3         | 44.0          |
| PC 40:6         | 142.7         | 8.5          | 147.1         | 24.5         | 124.4         |
| PC 40:5         | 16.4          | 2.2          | 15.2          | 3.3          | 15.6          |
| PC 40:4         | 42.2          | 3.3          | 41.9          | 7.6          | 37.3          |
| PC 40:3         | 2.2           | 1.0          | 1.6           | 1.2          | 2.1           |
| PC 40:2         | 11.2          | 2.0          | 9.8           | 1.0          | 10.0          |
| PC 42:11        | 0.5           | 0.3          | 0.5           | 0.1          | 0.5           |
| PC 42:10        | 5.6           | 0.7          | 4.9           | 0.6          | 5.7           |
| PC 42:9         | 5.0           | 0.9          | 4.2           | 0.8          | 4.6           |
| PC 42:8         | 8.9           | 1.3          | 7.7           | 1.5          | 8.2           |
| PC 42:7         | 5.1           | 1.1          | 4.7           | 0.2          | 4.2           |
| PC 42:6         | 1.5           | 0.1          | 1.3           | 0.3          | 1.3           |
| PC 42:5         | 5.5           | 0.5          | 5.6           | 0.9          | 4.6           |
| PC 42:4         | 6.3           | 1.3          | 6.6           | 1.0          | 5.9           |
| PC 42:3         | 6.5           | 1.1          | 5.6           | 0.8          | 5.8           |
| PC 42:2         | 17.4          | 4.3          | 14.9          | 2.5          | 15.7          |
| PC 44:12        | 4.7           | 0.5          | 5.7           | 1.2          | 5.4           |
| PC 44:11        | 0.6           | 0.2          | 1.0           | 0.0          | 0.5           |
| PC 44:10        | 1.8           | 0.1          | 2.2           | 0.6          | 2.0           |
| PC 44:9         | 1.3           | 0.3          | 1.1           | 0.2          | 1.2           |
| PC 44:8         | 3.5           | 0.6          | 3.6           | 0.5          | 3.4           |
| PC 44:7         | 0.0           | 0.0          | 0.2           | 0.1          | 0.1           |
| PC 44:6         | 0.9           | 0.3          | 0.7           | 0.2          | 0.8           |
| PC 44:5         | 4.5           | 0.8          | 4.0           | 0.7          | 3.8           |
| PC 44:4         | 1.6           | 0.7          | 1.6           | 0.3          | 1.5           |
| PC 44:3         | 0.8           | 0.1          | 0.9           | 0.1          | 0.9           |
| PC 44:2         | 3.5           | 0.7          | 2.7           | 0.3          | 3.1           |
| <b>Total PC</b> | <b>5889.0</b> | <b>351.9</b> | <b>5571.4</b> | <b>764.0</b> | <b>5050.9</b> |
|                 |               |              |               |              |               |
| SM 16:1         | 2.0           | 0.5          | 1.5           | 0.1          | 1.5           |
| SM 16:0         | 44.0          | 1.6          | 40.4          | 6.2          | 39.6          |
| SM 18:1         | 85.7          | 5.1          | 78.0          | 11.4         | 68.5          |
| SM 18:0         | 843.5         | 35.8         | 736.1         | 139.0        | 675.7         |
| SM 22:1         | 41.4          | 4.0          | 36.7          | 6.0          | 29.4          |
| SM 22:0         | 0.0           | 0.0          | 0.0           | 0.0          | 0.0           |
| SM 24:1         | 182.4         | 29.7         | 160.6         | 17.0         | 151.1         |
| SM 24:0         | 19.4          | 9.8          | 16.2          | 6.5          | 15.3          |
| <b>Total SM</b> | <b>1218.4</b> | <b>78.6</b>  | <b>1069.5</b> | <b>179.9</b> | <b>981.1</b>  |
|                 |               |              |               |              |               |
| ePC 32:3        | 0.2           | 0.1          | 0.1           | 0.1          | 0.2           |
| ePC 32:2        | 0.4           | 0.1          | 0.5           | 0.1          | 0.4           |

|                       |              |             |              |             |              |
|-----------------------|--------------|-------------|--------------|-------------|--------------|
| ePC 32:1              | 16.4         | 0.8         | 15.4         | 2.1         | 13.9         |
| ePC 32:0              | 26.1         | 1.6         | 24.2         | 4.5         | 21.4         |
| ePC 34:4              | 0.1          | 0.0         | 0.1          | 0.1         | 0.1          |
| ePC 34:3              | 0.9          | 0.2         | 0.9          | 0.2         | 0.9          |
| ePC 34:2              | 22.4         | 3.2         | 20.3         | 1.5         | 19.0         |
| ePC 34:1              | 130.3        | 18.6        | 119.8        | 11.4        | 107.0        |
| ePC 34:0              | 9.1          | 1.5         | 8.5          | 2.8         | 9.4          |
| ePC 36:4              | 8.3          | 1.0         | 8.0          | 1.6         | 7.1          |
| ePC 36:3              | 10.4         | 2.1         | 9.2          | 0.6         | 8.6          |
| ePC 36:2              | 24.4         | 3.4         | 22.5         | 1.4         | 20.1         |
| ePC 36:1              | 33.7         | 5.8         | 32.4         | 4.8         | 29.3         |
| ePC 36:0              | 1.1          | 0.4         | 0.6          | 0.5         | 0.4          |
| ePC 38:6              | 10.2         | 1.8         | 8.6          | 1.1         | 8.9          |
| ePC 38:5              | 2.6          | 1.1         | 2.8          | 1.1         | 3.1          |
| ePC 38:4              | 5.9          | 0.6         | 5.8          | 1.6         | 4.8          |
| ePC 38:3              | 1.4          | 0.1         | 1.2          | 0.3         | 0.8          |
| ePC 38:2              | 5.1          | 0.9         | 4.7          | 0.7         | 4.2          |
| ePC 38:1              | 4.7          | 0.7         | 5.0          | 0.6         | 4.4          |
| ePC 38:0              | 1.9          | 0.3         | 2.3          | 0.5         | 1.7          |
| ePC 40:6              | 1.0          | 0.6         | 1.8          | 0.6         | 0.8          |
| ePC 40:5              | 1.5          | 0.5         | 1.6          | 0.5         | 1.5          |
| ePC 40:4              | 1.7          | 0.3         | 1.8          | 0.3         | 1.7          |
| ePC 40:3              | 0.4          | 0.2         | 0.5          | 0.2         | 0.5          |
| ePC 40:2 (or PC 40:9) | 1.6          | 0.4         | 1.8          | 0.4         | 1.3          |
| <b>Total ePC</b>      | <b>321.9</b> | <b>37.9</b> | <b>300.3</b> | <b>31.6</b> | <b>271.5</b> |
|                       |              |             |              |             |              |
| LysoPE 16:1           | 0.1          | 0.1         | 0.0          | 0.1         | 0.0          |
| LysoPE 16:0           | 6.6          | 1.7         | 5.9          | 0.5         | 8.9          |
| LysoPE 18:3           | 0.0          | 0.0         | 0.0          | 0.0         | 0.0          |
| LysoPE 18:2           | 0.3          | 0.3         | 0.1          | 0.1         | 0.2          |
| LysoPE 18:1           | 22.3         | 4.0         | 19.5         | 1.5         | 19.4         |
| LysoPE 20:5           | 0.0          | 0.0         | 0.0          | 0.0         | 0.0          |
| LysoPE 20:4           | 5.9          | 0.8         | 4.9          | 1.0         | 4.7          |
| LysoPE 20:3           | 0.5          | 0.3         | 0.4          | 0.3         | 0.2          |
| LysoPE 20:2           | 0.1          | 0.1         | 0.1          | 0.0         | 0.1          |
| LysoPE 20:1           | 7.0          | 3.1         | 5.3          | 0.8         | 4.8          |
| LysoPE 20:0           | 0.0          | 0.0         | 0.1          | 0.1         | 0.0          |
| LysoPE 22:6           | 14.1         | 3.7         | 12.0         | 0.6         | 11.3         |
| LysoPE 22:5           | 0.4          | 0.4         | 0.5          | 0.4         | 0.6          |
| <b>Total LysoPE</b>   | <b>57.2</b>  | <b>10.6</b> | <b>48.8</b>  | <b>1.5</b>  | <b>50.3</b>  |
|                       |              |             |              |             |              |

|          |        |       |        |       |        |
|----------|--------|-------|--------|-------|--------|
| PE 28:0  | 0.0    | 0.0   | 0.0    | 0.0   | 0.0    |
| PE 28:1  | 0.0    | 0.0   | 0.0    | 0.0   | 0.0    |
| PE 30:1  | 0.0    | 0.0   | 0.0    | 0.0   | 0.0    |
| PE 30:0  | 0.0    | 0.0   | 0.1    | 0.2   | 0.0    |
| PE 32:2  | 0.0    | 0.0   | 0.0    | 0.0   | 0.0    |
| PE 32:1  | 1.3    | 1.2   | 1.7    | 0.6   | 0.8    |
| PE 32:0  | 4.0    | 2.6   | 3.7    | 2.2   | 3.2    |
| PE 34:4  | 0.0    | 0.0   | 0.1    | 0.2   | 0.0    |
| PE 34:3  | 0.4    | 0.3   | 0.0    | 0.0   | 0.1    |
| PE 34:2  | 11.7   | 2.7   | 11.4   | 4.1   | 9.1    |
| PE 34:1  | 190.7  | 16.2  | 203.7  | 36.3  | 170.0  |
| PE 34:0  | 18.0   | 3.5   | 17.1   | 5.3   | 13.6   |
| PE 36:6  | 0.4    | 0.3   | 0.1    | 0.1   | 0.0    |
| PE 36:5  | 2.2    | 1.1   | 2.6    | 0.6   | 1.4    |
| PE 36:4  | 207.5  | 13.7  | 214.0  | 32.0  | 167.7  |
| PE 36:3  | 12.7   | 6.1   | 11.9   | 3.0   | 9.1    |
| PE 36:2  | 283.5  | 39.1  | 289.0  | 47.5  | 243.7  |
| PE 36:1  | 382.9  | 40.6  | 379.2  | 70.5  | 318.0  |
| PE 36:0  | 35.9   | 5.9   | 38.9   | 5.4   | 28.6   |
| PE 38:6  | 663.9  | 49.4  | 679.6  | 128.3 | 527.2  |
| PE 38:5  | 247.3  | 22.2  | 268.2  | 53.0  | 204.9  |
| PE 38:4  | 1703.4 | 104.7 | 1723.8 | 300.6 | 1374.5 |
| PE 38:3  | 12.9   | 6.5   | 19.6   | 16.8  | 15.9   |
| PE 38:2  | 47.7   | 7.7   | 43.1   | 5.1   | 37.0   |
| PE 38:1  | 70.4   | 12.8  | 71.3   | 12.2  | 58.8   |
| PE 38:0  | 155.5  | 11.2  | 158.7  | 25.4  | 125.4  |
| PE 40:8  | 15.7   | 5.3   | 16.7   | 3.9   | 14.3   |
| PE 40:7  | 230.9  | 26.6  | 231.6  | 33.3  | 192.0  |
| PE 40:6  | 2691.1 | 225.9 | 2746.7 | 432.9 | 2155.1 |
| PE 40:5  | 123.3  | 10.4  | 120.3  | 28.6  | 91.9   |
| PE 40:4  | 488.0  | 42.6  | 466.9  | 91.3  | 398.6  |
| PE 40:3  | 0.0    | 0.0   | 0.9    | 1.1   | 0.0    |
| PE 40:2  | 11.4   | 2.4   | 9.8    | 3.1   | 10.0   |
| PE 42:10 | 13.3   | 0.7   | 12.6   | 3.5   | 12.6   |
| PE 42:9  | 15.2   | 3.8   | 11.8   | 2.5   | 12.0   |
| PE 42:8  | 14.1   | 2.3   | 16.0   | 4.4   | 12.9   |
| PE 42:7  | 11.4   | 2.2   | 13.0   | 1.8   | 11.3   |
| PE 42:6  | 6.4    | 2.2   | 6.7    | 3.3   | 8.0    |
| PE 42:5  | 11.1   | 2.7   | 11.3   | 2.7   | 9.5    |
| PE 42:4  | 21.8   | 2.6   | 25.7   | 2.6   | 19.6   |
| PE 42:3  | 0.0    | 0.0   | 0.0    | 0.0   | 0.0    |

|                     |               |              |               |               |               |
|---------------------|---------------|--------------|---------------|---------------|---------------|
| PE 42:2             | 2.9           | 0.8          | 1.9           | 1.1           | 2.5           |
| PE 44:12            | 18.1          | 4.8          | 17.3          | 2.6           | 15.0          |
| PE 44:11            | 5.2           | 2.3          | 5.5           | 1.1           | 4.8           |
| PE 44:10            | 48.7          | 4.3          | 49.3          | 6.7           | 38.8          |
| PE 44:9             | 1.2           | 2.1          | 0.4           | 0.7           | 0.3           |
| PE 44:8             | 1.9           | 0.3          | 1.0           | 0.8           | 2.2           |
| PE 44:7             | 0.1           | 0.1          | 0.0           | 0.0           | 0.2           |
| PE 44:6             | 0.1           | 0.1          | 0.0           | 0.0           | 0.0           |
| PE 44:5             | 0.2           | 0.3          | 0.2           | 0.3           | 0.2           |
| PE 44:4             | 0.2           | 0.2          | 0.2           | 0.3           | 0.1           |
| PE 44:3             | 0.1           | 0.1          | 0.0           | 0.0           | 0.0           |
| PE 44:2             | 0.2           | 0.2          | 0.0           | 0.0           | 0.1           |
| <b>Total PE</b>     | <b>7784.6</b> | <b>596.5</b> | <b>7903.8</b> | <b>1331.0</b> | <b>6320.7</b> |
|                     |               |              |               |               |               |
| PE-cer 16:1         | 0.1           | 0.2          | 0.0           | 0.0           | 0.0           |
| PE-cer 16:0         | 0.0           | 0.0          | 0.0           | 0.0           | 0.0           |
| PE-cer 18:1         | 0.0           | 0.0          | 0.0           | 0.0           | 0.0           |
| PE-cer 18:0         | 0.1           | 0.2          | 0.0           | 0.0           | 0.2           |
| PE-cer 24:0         | 0.0           | 0.0          | 1.4           | 2.7           | 1.9           |
| <b>Total PE-cer</b> | <b>0.2</b>    | <b>0.2</b>   | <b>1.4</b>    | <b>2.7</b>    | <b>2.1</b>    |
|                     |               |              |               |               |               |
| ePE 32:1            | 0.1           | 0.2          | 0.0           | 0.0           | 0.3           |
| ePE 32:0            | 0.2           | 0.5          | 0.0           | 0.0           | 0.2           |
| ePE 34:3            | 0.1           | 0.1          | 0.0           | 0.0           | 0.5           |
| ePE 34:1            | 38.0          | 6.8          | 33.4          | 5.7           | 30.8          |
| ePE 34:0            | 0.9           | 1.2          | 1.7           | 1.4           | 0.3           |
| ePE 36:5            | 20.9          | 3.3          | 21.1          | 5.7           | 18.5          |
| ePE 36:4            | 25.6          | 3.5          | 27.2          | 6.0           | 21.6          |
| ePE 36:3            | 65.9          | 7.0          | 64.8          | 8.3           | 53.2          |
| ePE 36:2            | 76.6          | 9.8          | 81.2          | 11.2          | 66.4          |
| ePE 36:1            | 43.8          | 5.3          | 40.7          | 9.4           | 34.5          |
| ePE 36:0            | 0.0           | 0.0          | 0.2           | 0.4           | 0.4           |
| ePE 38:6            | 96.0          | 11.9         | 99.2          | 15.7          | 84.6          |
| ePE 38:5            | 97.9          | 9.2          | 100.4         | 16.4          | 83.9          |
| ePE 38:4            | 101.0         | 12.3         | 91.8          | 11.7          | 81.2          |
| ePE 38:3            | 27.4          | 6.1          | 30.4          | 4.6           | 21.8          |
| ePE 38:2            | 20.4          | 1.5          | 23.0          | 5.2           | 17.9          |
| ePE 38:1            | 10.9          | 1.5          | 8.0           | 2.0           | 8.6           |
| ePE 38:0            | 7.1           | 1.8          | 7.2           | 3.1           | 4.4           |
| ePE 40:6            | 117.3         | 7.1          | 116.7         | 17.8          | 103.1         |
| ePE 40:5            | 62.1          | 7.1          | 64.5          | 7.0           | 51.7          |

|                  |              |             |              |              |              |
|------------------|--------------|-------------|--------------|--------------|--------------|
| ePE 40:4         | 49.2         | 1.1         | 44.8         | 6.7          | 41.7         |
| ePE 40:3         | 1.6          | 2.7         | 1.9          | 1.9          | 2.0          |
| ePE 40:2         | 8.7          | 2.8         | 6.9          | 1.2          | 6.4          |
| <b>Total ePE</b> | <b>895.8</b> | <b>86.1</b> | <b>888.8</b> | <b>127.5</b> | <b>759.1</b> |
|                  |              |             |              |              |              |
| PI 34:4          | 0.0          | 0.0         | 0.0          | 0.0          | 0.0          |
| PI 34:3          | 0.0          | 0.0         | 0.0          | 0.0          | 0.1          |
| PI 34:2          | 1.4          | 0.6         | 1.0          | 0.4          | 1.6          |
| PI 34:1          | 16.7         | 1.0         | 15.6         | 3.6          | 15.6         |
| PI 36:6          | 0.0          | 0.0         | 0.0          | 0.1          | 0.0          |
| PI 36:5          | 0.2          | 0.1         | 0.3          | 0.2          | 0.4          |
| PI 36:4          | 103.6        | 7.9         | 104.4        | 14.6         | 94.1         |
| PI 36:3          | 0.0          | 0.0         | 0.0          | 0.0          | 0.0          |
| PI 36:2          | 2.5          | 0.9         | 2.7          | 1.4          | 2.6          |
| PI 36:1          | 3.9          | 1.3         | 2.5          | 1.4          | 3.2          |
| PI 38:6          | 9.0          | 2.0         | 9.7          | 2.9          | 9.0          |
| PI 38:5          | 32.3         | 8.4         | 30.3         | 5.4          | 27.0         |
| PI 38:4          | 326.4        | 59.7        | 337.2        | 47.2         | 291.8        |
| PI 38:3          | 0.0          | 0.0         | 0.0          | 0.0          | 0.0          |
| PI 38:2          | 0.7          | 0.5         | 0.4          | 0.2          | 0.5          |
| PI 38:1          | 0.0          | 0.0         | 0.0          | 0.0          | 0.0          |
| PI 38:0          | 0.0          | 0.0         | 0.0          | 0.0          | 0.0          |
| PI 40:8          | 0.5          | 0.7         | 0.1          | 0.1          | 0.4          |
| PI 40:7          | 0.4          | 0.2         | 0.5          | 0.2          | 0.7          |
| PI 40:6          | 8.3          | 3.1         | 8.8          | 1.0          | 8.9          |
| PI 40:5          | 1.3          | 0.7         | 0.2          | 0.5          | 0.6          |
| PI 40:4          | 0.7          | 0.6         | 1.7          | 0.7          | 2.0          |
| <b>Total PI</b>  | <b>508.0</b> |             | <b>515.5</b> |              | <b>458.5</b> |
|                  |              |             |              |              |              |
| PS 32:1          | 0.0          | 0.0         | 0.0          | 0.0          | 0.0          |
| PS 32:0          | 0.1          | 0.1         | 0.1          | 0.1          | 0.1          |
| ePS 34:2         | 0.0          | 0.0         | 0.0          | 0.0          | 0.0          |
| ePS 34:1         | 0.3          | 0.3         | 0.2          | 0.1          | 0.5          |
| PS 34:3          | 0.0          | 0.0         | 0.0          | 0.0          | 0.0          |
| PS 34:2          | 0.1          | 0.0         | 0.1          | 0.1          | 0.1          |
| PS 34:1          | 19.9         | 4.7         | 19.5         | 2.6          | 14.7         |
| PS 34:0          | 0.2          | 0.2         | 0.0          | 0.0          | 0.3          |
| ePS 36:2         | 0.0          | 0.0         | 0.0          | 0.0          | 0.0          |
| ePS 36:1         | 2.4          | 1.2         | 2.0          | 0.4          | 2.0          |
| PS 36:4          | 1.6          | 0.4         | 1.3          | 0.1          | 1.0          |
| PS 36:3          | 0.1          | 0.1         | 0.0          | 0.0          | 0.3          |

|                    |               |              |               |              |              |
|--------------------|---------------|--------------|---------------|--------------|--------------|
| PS 36:2            | 42.4          | 10.0         | 37.6          | 1.9          | 34.1         |
| PS 36:1            | 179.4         | 44.5         | 160.1         | 13.6         | 148.6        |
| PS 36:0            | 0.0           | 0.0          | 0.0           | 0.0          | 0.0          |
| ePS 38:6           | 0.2           | 0.1          | 0.2           | 0.1          | 0.2          |
| ePS 38:4           | 0.1           | 0.1          | 0.0           | 0.0          | 0.1          |
| ePS 38:3           | 0.0           | 0.0          | 0.1           | 0.1          | 0.0          |
| ePS 38:2           | 0.0           | 0.0          | 0.0           | 0.0          | 0.0          |
| ePS 38:1           | 0.3           | 0.3          | 0.3           | 0.2          | 0.2          |
| PS 38:6            | 2.3           | 0.8          | 2.2           | 0.7          | 2.7          |
| PS 38:5            | 3.5           | 1.0          | 2.4           | 0.5          | 2.6          |
| PS 38:4            | 42.8          | 8.5          | 39.6          | 4.2          | 36.7         |
| PS 38:3            | 5.3           | 2.1          | 4.3           | 2.9          | 4.1          |
| PS 38:2            | 6.7           | 3.9          | 6.3           | 0.6          | 5.9          |
| PS 38:1            | 21.1          | 8.1          | 18.0          | 4.2          | 16.6         |
| ePS 40:5           | 0.0           | 0.0          | 0.0           | 0.0          | 0.0          |
| ePS 40:4           | 0.0           | 0.0          | 0.0           | 0.1          | 0.1          |
| ePS 40:3           | 0.0           | 0.0          | 0.0           | 0.0          | 0.0          |
| ePS 40:2           | 0.0           | 0.0          | 0.1           | 0.1          | 0.1          |
| PS 40:8 (ePS 40:1) | 0.4           | 0.3          | 0.5           | 0.4          | 0.6          |
| PS 40:7 (ePS 40:0) | 10.9          | 3.6          | 9.8           | 1.3          | 8.6          |
| PS 40:6            | 672.2         | 109.7        | 672.2         | 94.6         | 560.4        |
| PS 40:5            | 22.2          | 8.6          | 18.8          | 11.0         | 14.6         |
| PS 40:4            | 105.4         | 22.9         | 109.3         | 17.9         | 91.8         |
| PS 40:3            | 0.4           | 0.9          | 0.0           | 0.0          | 0.4          |
| PS 40:2            | 20.5          | 7.9          | 18.4          | 5.0          | 16.8         |
| PS 40:1            | 15.1          | 3.3          | 12.6          | 0.6          | 9.6          |
| PS 42:11           | 0.6           | 1.2          | 2.0           | 4.1          | 0.0          |
| PS 42:10           | 0.0           | 0.0          | 0.0           | 0.0          | 9.5          |
| PS 42:9            | 0.0           | 0.0          | 0.0           | 0.0          | 0.0          |
| PS 42:8            | 0.0           | 0.0          | 0.0           | 0.0          | 0.0          |
| PS 42:7            | 0.2           | 0.4          | 0.0           | 0.0          | 0.0          |
| PS 42:6            | 0.0           | 0.0          | 0.0           | 0.0          | 0.0          |
| PS 44:11           | 0.0           | 0.1          | 0.0           | 0.0          | 0.1          |
| PS 44:10           | 0.0           | 0.0          | 0.0           | 0.0          | 0.0          |
| PS 44:9            | 0.1           | 0.1          | 0.3           | 0.3          | 0.6          |
| <b>Total PS</b>    | <b>1176.9</b> | <b>221.2</b> | <b>1138.3</b> | <b>144.2</b> | <b>984.0</b> |
|                    |               |              |               |              |              |
| PA 32:1            | 0.8           | 0.6          | 0.2           | 0.2          | 0.5          |
| PA 32:0            | 2.8           | 1.2          | 1.9           | 0.6          | 2.3          |
| PA 34:3            | 0.1           | 0.2          | 0.0           | 0.0          | 0.0          |
| PA 34:2            | 1.1           | 0.7          | 0.5           | 0.5          | 1.4          |

|                           |              |             |              |             |              |
|---------------------------|--------------|-------------|--------------|-------------|--------------|
| PA 34:1                   | 27.9         | 4.3         | 18.4         | 1.6         | 27.5         |
| PA 36:4                   | 2.6          | 0.8         | 1.8          | 1.7         | 2.6          |
| PA 36:3                   | 0.0          | 0.0         | 0.1          | 0.1         | 0.1          |
| PA 36:2                   | 6.1          | 1.1         | 4.6          | 1.1         | 6.8          |
| PA 38:6                   | 0.0          | 0.0         | 0.1          | 0.1         | 0.0          |
| PA 38:5                   | 0.3          | 0.3         | 0.0          | 0.0         | 0.1          |
| PA 38:4                   | 5.2          | 3.0         | 2.1          | 0.9         | 4.9          |
| PA 38:3                   | 0.0          | 0.0         | 0.0          | 0.0         | 0.0          |
| PA 38:2                   | 0.5          | 0.9         | 0.2          | 0.3         | 0.2          |
| PA 40:7                   | 0.0          | 0.0         | 0.0          | 0.0         | 0.0          |
| PA 40:6                   | 0.0          | 0.1         | 0.8          | 0.7         | 0.3          |
| PA 40:5                   | 0.0          | 0.0         | 0.2          | 0.2         | 0.2          |
| <b>Total PA</b>           | <b>47.5</b>  | <b>9.8</b>  | <b>30.8</b>  | <b>3.0</b>  | <b>47.2</b>  |
|                           |              |             |              |             |              |
| <b>Total Phospholipid</b> | <b>18004</b> | <b>1184</b> | <b>17559</b> | <b>2603</b> | <b>15092</b> |



onent (total acyl carbons: total carbon-carbon double bonds) of each detected species. Data are shown :

| stdev        | II-NAE 16:0  | stdev      | SC-Vehicle   | stdev      | SC-NAE 16:0  | stdev       | SI-Vehicle   |
|--------------|--------------|------------|--------------|------------|--------------|-------------|--------------|
| 0.5          | 0.7          | 0.6        | 0.5          | 0.2        | 1.0          | 1.1         | 0.5          |
| 59.4         | 53.8         | 5.4        | 44.9         | 4.5        | 55.7         | 19.5        | 47.6         |
| 0.0          | 0.0          | 0.0        | 0.1          | 0.1        | 0.1          | 0.2         | 0.0          |
| 1.2          | 1.1          | 0.3        | 1.5          | 0.3        | 1.2          | 0.6         | 1.2          |
| 17.7         | 22.8         | 1.3        | 23.2         | 1.6        | 25.1         | 8.3         | 23.1         |
| 30.4         | 21.5         | 1.7        | 19.6         | 2.7        | 23.2         | 9.2         | 19.0         |
| 0.1          | 0.0          | 0.0        | 0.1          | 0.1        | 0.1          | 0.2         | 0.0          |
| 2.8          | 3.9          | 0.5        | 6.1          | 0.8        | 4.2          | 1.2         | 5.8          |
| 0.1          | 0.0          | 0.0        | 0.0          | 0.1        | 0.0          | 0.1         | 0.0          |
| 0.4          | 0.1          | 0.1        | 0.1          | 0.1        | 0.2          | 0.2         | 0.1          |
| 1.2          | 1.0          | 0.3        | 1.1          | 0.3        | 2.0          | 1.0         | 1.1          |
| 0.1          | 0.2          | 0.2        | 0.3          | 0.2        | 0.9          | 0.8         | 0.5          |
| 2.9          | 3.1          | 0.5        | 4.2          | 0.8        | 2.8          | 1.3         | 4.6          |
| 0.1          | 0.1          | 0.1        | 0.3          | 0.1        | 0.3          | 0.4         | 0.1          |
| <b>116.3</b> | <b>108.4</b> | <b>9.4</b> | <b>102.1</b> | <b>8.2</b> | <b>117.0</b> | <b>41.2</b> | <b>103.7</b> |
|              |              |            |              |            |              |             |              |
| 0.2          | 0.2          | 0.0        | 0.4          | 0.1        | 0.7          | 0.7         | 0.4          |
| 2.7          | 24.7         | 1.6        | 24.1         | 1.5        | 23.3         | 6.2         | 26.9         |
| 7.4          | 47.2         | 12.0       | 52.4         | 3.0        | 39.6         | 6.3         | 51.3         |
| 138.4        | 1004.5       | 100.2      | 1088.0       | 20.8       | 1148.0       | 288.3       | 1138.9       |
| 0.0          | 0.4          | 0.2        | 0.4          | 0.1        | 0.3          | 0.2         | 0.4          |
| 0.8          | 1.8          | 0.2        | 1.1          | 0.2        | 1.4          | 0.3         | 1.2          |
| 12.3         | 80.1         | 4.6        | 70.6         | 4.5        | 85.5         | 27.5        | 71.5         |
| 263.3        | 1304.9       | 220.5      | 1510.5       | 34.6       | 1640.0       | 450.5       | 1657.2       |
| 5.0          | 158.4        | 8.7        | 139.1        | 14.7       | 137.8        | 23.1        | 152.3        |
| 0.1          | 0.5          | 0.1        | 0.4          | 0.1        | 0.6          | 0.2         | 0.4          |
| 0.3          | 1.7          | 0.3        | 1.8          | 0.2        | 2.1          | 0.5         | 2.1          |
| 77.2         | 277.4        | 51.6       | 308.4        | 14.6       | 339.6        | 64.9        | 337.7        |
| 3.5          | 8.5          | 5.7        | 2.8          | 1.3        | 6.5          | 5.3         | 1.6          |
| 30.0         | 139.6        | 19.9       | 153.1        | 10.5       | 169.1        | 37.9        | 166.1        |
| 99.5         | 573.8        | 61.4       | 649.7        | 31.2       | 634.4        | 106.1       | 697.2        |
| 36.1         | 205.4        | 15.3       | 198.9        | 16.6       | 215.2        | 41.3        | 219.7        |
| 18.5         | 55.3         | 10.3       | 57.8         | 3.3        | 69.2         | 12.0        | 61.6         |
| 44.2         | 262.8        | 28.5       | 271.3        | 26.7       | 299.4        | 57.2        | 301.9        |
| 1.7          | 0.6          | 1.1        | 0.0          | 0.0        | 1.6          | 2.8         | 0.0          |
| 3.2          | 10.2         | 4.1        | 12.2         | 2.0        | 13.6         | 8.6         | 11.8         |
| 2.3          | 14.0         | 1.8        | 16.2         | 1.3        | 15.0         | 4.5         | 19.4         |
| 3.3          | 11.4         | 2.5        | 8.0          | 1.8        | 10.2         | 1.4         | 12.3         |
| 0.9          | 5.1          | 0.7        | 3.6          | 0.5        | 4.7          | 1.7         | 4.5          |

|              |               |              |               |             |               |               |               |
|--------------|---------------|--------------|---------------|-------------|---------------|---------------|---------------|
| 4.9          | 40.9          | 4.1          | 38.5          | 3.8         | 43.0          | 6.5           | 44.1          |
| 16.8         | 120.3         | 6.3          | 117.7         | 9.5         | 113.9         | 12.1          | 122.8         |
| 2.1          | 13.3          | 3.7          | 11.9          | 0.8         | 16.9          | 7.5           | 14.5          |
| 3.4          | 35.1          | 3.9          | 33.4          | 2.9         | 38.7          | 6.8           | 37.7          |
| 1.9          | 1.0           | 0.9          | 0.6           | 0.3         | 0.7           | 0.8           | 0.8           |
| 1.7          | 7.6           | 1.1          | 9.9           | 1.3         | 9.7           | 3.9           | 11.9          |
| 0.1          | 0.4           | 0.2          | 0.4           | 0.1         | 0.5           | 0.2           | 0.3           |
| 1.0          | 5.7           | 1.0          | 4.4           | 0.8         | 4.4           | 0.4           | 5.3           |
| 0.8          | 3.7           | 0.6          | 5.0           | 0.6         | 4.8           | 1.5           | 6.0           |
| 1.0          | 7.0           | 0.6          | 9.3           | 0.9         | 8.7           | 2.7           | 10.2          |
| 1.1          | 3.8           | 0.4          | 4.7           | 0.4         | 4.7           | 1.4           | 5.1           |
| 0.3          | 1.3           | 0.2          | 0.8           | 0.5         | 1.2           | 0.2           | 1.6           |
| 1.0          | 5.1           | 0.5          | 4.2           | 0.7         | 4.4           | 0.9           | 5.2           |
| 0.9          | 4.5           | 0.3          | 5.4           | 0.8         | 5.4           | 1.0           | 5.5           |
| 1.5          | 4.6           | 1.0          | 4.1           | 0.4         | 5.1           | 1.2           | 5.6           |
| 3.5          | 12.3          | 1.2          | 17.2          | 1.6         | 15.8          | 5.7           | 20.3          |
| 0.9          | 5.3           | 0.3          | 4.2           | 0.5         | 4.9           | 1.0           | 4.7           |
| 0.2          | 0.5           | 0.3          | 1.2           | 0.2         | 0.8           | 0.3           | 0.8           |
| 0.2          | 2.0           | 0.1          | 2.0           | 0.4         | 2.0           | 0.6           | 1.7           |
| 0.1          | 0.9           | 0.3          | 1.3           | 0.2         | 1.3           | 0.6           | 1.8           |
| 0.4          | 2.6           | 0.1          | 3.4           | 0.2         | 3.7           | 1.3           | 3.6           |
| 0.1          | 0.1           | 0.1          | 0.2           | 0.1         | 0.5           | 0.4           | 0.0           |
| 0.3          | 0.6           | 0.2          | 0.5           | 0.2         | 0.5           | 0.1           | 0.7           |
| 0.5          | 3.7           | 0.5          | 3.9           | 0.1         | 3.5           | 0.4           | 4.2           |
| 0.3          | 1.3           | 0.5          | 1.5           | 0.7         | 2.0           | 0.8           | 1.9           |
| 0.1          | 0.7           | 0.2          | 0.6           | 0.4         | 0.8           | 0.2           | 0.7           |
| 0.7          | 2.3           | 0.7          | 3.2           | 0.4         | 3.0           | 0.5           | 3.6           |
| <b>739.1</b> | <b>4475.5</b> | <b>520.2</b> | <b>4860.4</b> | <b>92.8</b> | <b>5158.6</b> | <b>1160.8</b> | <b>5256.9</b> |
|              |               |              |               |             |               |               |               |
| 0.2          | 1.5           | 0.6          | 1.7           | 0.5         | 1.7           | 0.7           | 1.5           |
| 3.1          | 32.7          | 4.9          | 35.0          | 1.6         | 40.5          | 10.0          | 37.0          |
| 17.3         | 61.6          | 5.2          | 65.3          | 3.6         | 70.0          | 17.3          | 71.1          |
| 148.9        | 576.8         | 70.4         | 579.9         | 37.0        | 639.4         | 103.0         | 636.4         |
| 4.3          | 24.5          | 7.8          | 25.6          | 1.3         | 30.3          | 8.8           | 25.3          |
| 0.0          | 0.0           | 0.0          | 0.0           | 0.0         | 0.0           | 0.0           | 0.0           |
| 19.3         | 136.5         | 14.4         | 156.1         | 21.8        | 148.1         | 14.1          | 172.2         |
| 1.4          | 11.1          | 6.9          | 9.0           | 3.3         | 10.4          | 5.2           | 18.4          |
| <b>190.8</b> | <b>844.7</b>  | <b>105.9</b> | <b>872.5</b>  | <b>57.6</b> | <b>940.5</b>  | <b>146.7</b>  | <b>962.0</b>  |
|              |               |              |               |             |               |               |               |
| 0.1          | 0.1           | 0.1          | 0.3           | 0.1         | 0.3           | 0.2           | 0.2           |
| 0.1          | 0.4           | 0.1          | 0.3           | 0.1         | 0.4           | 0.2           | 0.5           |

|             |              |             |              |             |              |             |              |
|-------------|--------------|-------------|--------------|-------------|--------------|-------------|--------------|
| 1.4         | 12.9         | 1.5         | 13.4         | 0.6         | 13.6         | 3.2         | 13.9         |
| 2.2         | 19.9         | 0.8         | 19.1         | 1.0         | 22.2         | 6.8         | 21.7         |
| 0.0         | 0.1          | 0.0         | 0.2          | 0.1         | 0.2          | 0.2         | 0.1          |
| 0.2         | 0.8          | 0.2         | 0.8          | 0.1         | 1.0          | 0.5         | 0.7          |
| 2.7         | 16.6         | 0.5         | 17.2         | 1.7         | 18.7         | 6.2         | 20.1         |
| 17.3        | 93.5         | 11.6        | 95.4         | 8.3         | 111.8        | 36.5        | 109.3        |
| 1.0         | 7.9          | 0.8         | 7.3          | 1.1         | 7.1          | 2.4         | 7.7          |
| 0.6         | 6.3          | 0.4         | 6.4          | 0.8         | 7.9          | 2.6         | 7.1          |
| 0.8         | 7.5          | 0.9         | 9.4          | 1.0         | 9.8          | 3.0         | 10.9         |
| 3.0         | 18.2         | 1.6         | 18.2         | 1.5         | 21.7         | 5.9         | 20.7         |
| 5.3         | 25.9         | 2.9         | 28.3         | 2.3         | 31.5         | 7.4         | 31.5         |
| 0.0         | 1.1          | 1.0         | 1.6          | 0.7         | 2.6          | 2.9         | 2.1          |
| 0.6         | 7.1          | 1.2         | 5.6          | 1.1         | 5.8          | 0.9         | 7.8          |
| 0.3         | 2.1          | 0.6         | 2.5          | 0.3         | 3.0          | 1.4         | 2.0          |
| 1.6         | 4.2          | 0.9         | 4.0          | 0.9         | 5.4          | 1.6         | 5.0          |
| 0.3         | 1.0          | 0.2         | 1.8          | 0.3         | 1.7          | 0.7         | 1.8          |
| 0.9         | 4.0          | 0.3         | 4.6          | 0.7         | 4.5          | 1.0         | 5.0          |
| 0.7         | 4.1          | 0.7         | 4.6          | 0.9         | 4.9          | 1.6         | 5.1          |
| 0.5         | 1.5          | 0.3         | 1.5          | 0.1         | 2.3          | 1.7         | 1.6          |
| 0.7         | 1.3          | 0.5         | 1.3          | 0.9         | 0.8          | 0.5         | 0.8          |
| 0.3         | 1.7          | 0.4         | 1.6          | 0.4         | 2.0          | 1.0         | 1.4          |
| 0.4         | 1.6          | 0.2         | 1.9          | 0.6         | 2.0          | 0.7         | 1.5          |
| 0.1         | 0.3          | 0.1         | 0.5          | 0.2         | 0.7          | 0.3         | 0.7          |
| 0.3         | 1.5          | 0.5         | 1.4          | 0.1         | 1.6          | 0.2         | 1.5          |
| <b>37.7</b> | <b>241.6</b> | <b>21.5</b> | <b>249.2</b> | <b>15.0</b> | <b>283.6</b> | <b>82.8</b> | <b>280.8</b> |
|             |              |             |              |             |              |             |              |
| 0.0         | 0.1          | 0.0         | 0.1          | 0.1         | 0.2          | 0.3         | 0.0          |
| 5.2         | 5.6          | 0.9         | 5.4          | 0.5         | 7.2          | 1.8         | 5.4          |
| 0.0         | 0.0          | 0.0         | 0.0          | 0.0         | 0.0          | 0.0         | 0.0          |
| 0.1         | 0.2          | 0.0         | 0.2          | 0.1         | 0.1          | 0.1         | 0.2          |
| 2.1         | 21.2         | 2.2         | 22.7         | 0.8         | 26.5         | 8.5         | 20.6         |
| 0.0         | 0.0          | 0.0         | 0.0          | 0.0         | 0.0          | 0.0         | 0.0          |
| 1.3         | 5.0          | 0.9         | 6.8          | 1.6         | 6.1          | 1.5         | 5.8          |
| 0.2         | 0.3          | 0.2         | 0.2          | 0.3         | 0.4          | 0.4         | 0.4          |
| 0.1         | 0.2          | 0.1         | 0.2          | 0.1         | 1.0          | 1.2         | 0.2          |
| 1.2         | 5.9          | 1.7         | 16.4         | 1.4         | 28.4         | 27.2        | 4.8          |
| 0.0         | 0.0          | 0.0         | 0.1          | 0.1         | 0.1          | 0.1         | 0.0          |
| 2.1         | 11.3         | 0.3         | 12.0         | 1.0         | 13.5         | 3.0         | 11.9         |
| 0.3         | 0.2          | 0.2         | 0.5          | 0.3         | 0.5          | 0.5         | 0.4          |
| <b>4.7</b>  | <b>50.1</b>  | <b>2.9</b>  | <b>64.6</b>  | <b>4.2</b>  | <b>84.0</b>  | <b>42.3</b> | <b>49.8</b>  |
|             |              |             |              |             |              |             |              |

|       |        |       |        |       |        |       |        |
|-------|--------|-------|--------|-------|--------|-------|--------|
| 0.0   | 0.0    | 0.0   | 0.0    | 0.0   | 0.0    | 0.0   | 0.0    |
| 0.0   | 0.0    | 0.0   | 0.0    | 0.0   | 0.0    | 0.0   | 0.1    |
| 0.0   | 0.0    | 0.0   | 0.0    | 0.0   | 0.0    | 0.0   | 0.0    |
| 0.0   | 0.0    | 0.0   | 0.0    | 0.0   | 0.1    | 0.3   | 0.2    |
| 0.0   | 0.0    | 0.0   | 0.0    | 0.0   | 0.0    | 0.0   | 0.0    |
| 0.7   | 0.2    | 0.4   | 0.9    | 0.5   | 0.7    | 0.4   | 1.3    |
| 1.5   | 4.4    | 1.3   | 2.1    | 1.0   | 3.1    | 1.2   | 3.4    |
| 0.0   | 0.0    | 0.0   | 0.0    | 0.0   | 0.0    | 0.0   | 0.0    |
| 0.2   | 0.1    | 0.1   | 0.1    | 0.2   | 0.1    | 0.1   | 0.1    |
| 1.3   | 11.5   | 4.4   | 8.8    | 3.2   | 8.1    | 2.6   | 7.5    |
| 20.1  | 186.5  | 16.5  | 190.0  | 21.4  | 198.5  | 41.5  | 189.5  |
| 5.5   | 15.4   | 4.6   | 8.1    | 3.3   | 11.1   | 4.9   | 10.1   |
| 0.0   | 0.3    | 0.3   | 0.3    | 0.2   | 0.2    | 0.2   | 0.0    |
| 0.7   | 2.1    | 1.3   | 3.6    | 1.0   | 3.3    | 1.3   | 3.2    |
| 30.3  | 180.8  | 20.5  | 202.6  | 15.6  | 214.5  | 46.8  | 201.1  |
| 3.2   | 15.5   | 4.2   | 9.2    | 4.3   | 9.7    | 3.1   | 6.9    |
| 48.4  | 259.1  | 36.5  | 292.1  | 22.7  | 319.2  | 96.1  | 305.1  |
| 50.0  | 346.8  | 36.7  | 380.8  | 28.7  | 379.1  | 87.2  | 381.7  |
| 8.1   | 30.7   | 7.8   | 36.8   | 8.9   | 35.9   | 8.7   | 29.3   |
| 112.3 | 572.9  | 96.0  | 632.0  | 57.5  | 649.2  | 143.4 | 621.3  |
| 57.1  | 235.5  | 37.0  | 249.1  | 22.6  | 259.0  | 53.9  | 266.7  |
| 300.1 | 1473.6 | 157.2 | 1632.9 | 119.6 | 1642.2 | 296.1 | 1566.6 |
| 4.4   | 15.8   | 16.6  | 13.6   | 6.5   | 21.5   | 22.6  | 12.0   |
| 7.5   | 39.7   | 2.5   | 48.6   | 8.3   | 45.7   | 12.2  | 47.9   |
| 7.9   | 58.2   | 7.4   | 70.6   | 6.3   | 77.8   | 15.9  | 72.4   |
| 24.8  | 134.9  | 22.8  | 141.1  | 16.2  | 149.4  | 39.5  | 142.3  |
| 2.5   | 17.6   | 2.9   | 12.9   | 2.8   | 13.9   | 2.4   | 13.2   |
| 39.6  | 208.1  | 25.4  | 204.2  | 15.6  | 218.7  | 42.3  | 213.0  |
| 445.1 | 2338.4 | 293.0 | 2516.4 | 244.5 | 2586.9 | 559.7 | 2484.3 |
| 23.2  | 102.3  | 22.9  | 112.7  | 10.8  | 128.2  | 53.3  | 93.5   |
| 68.9  | 426.4  | 47.8  | 454.2  | 50.2  | 482.0  | 113.6 | 457.3  |
| 0.0   | 0.5    | 1.1   | 0.5    | 1.1   | 0.7    | 1.4   | 1.5    |
| 2.9   | 8.3    | 1.8   | 12.3   | 3.1   | 9.7    | 8.6   | 8.6    |
| 2.6   | 12.6   | 2.8   | 12.4   | 3.1   | 12.6   | 2.3   | 11.6   |
| 3.1   | 13.1   | 3.1   | 16.9   | 1.0   | 13.7   | 5.5   | 11.7   |
| 2.6   | 11.4   | 0.9   | 12.8   | 2.5   | 17.6   | 3.3   | 14.2   |
| 1.9   | 10.2   | 1.5   | 12.4   | 2.3   | 8.5    | 1.3   | 10.4   |
| 2.8   | 8.0    | 1.6   | 5.3    | 0.7   | 6.1    | 2.5   | 5.8    |
| 3.1   | 9.3    | 3.5   | 9.7    | 2.4   | 12.2   | 6.6   | 9.4    |
| 5.5   | 21.9   | 1.2   | 19.4   | 0.7   | 24.1   | 4.6   | 19.9   |
| 0.0   | 0.0    | 0.0   | 0.0    | 0.0   | 0.0    | 0.0   | 0.0    |

|               |               |              |               |              |               |               |               |
|---------------|---------------|--------------|---------------|--------------|---------------|---------------|---------------|
| 0.8           | 1.3           | 1.2          | 2.7           | 0.8          | 1.4           | 0.4           | 1.5           |
| 2.1           | 15.8          | 0.7          | 15.6          | 1.0          | 15.1          | 4.1           | 15.8          |
| 1.2           | 4.8           | 2.2          | 4.1           | 1.7          | 4.4           | 2.8           | 4.8           |
| 9.7           | 42.0          | 5.9          | 48.7          | 3.0          | 46.9          | 8.6           | 48.2          |
| 0.6           | 0.0           | 0.0          | 0.0           | 0.0          | 0.8           | 0.9           | 1.6           |
| 1.0           | 2.0           | 0.6          | 1.5           | 1.4          | 1.6           | 1.5           | 1.0           |
| 0.2           | 0.2           | 0.3          | 0.2           | 0.2          | 0.3           | 0.1           | 0.2           |
| 0.0           | 0.0           | 0.0          | 0.0           | 0.1          | 0.0           | 0.0           | 0.0           |
| 0.2           | 0.2           | 0.3          | 0.3           | 0.2          | 0.1           | 0.1           | 0.3           |
| 0.2           | 0.1           | 0.1          | 0.1           | 0.2          | 0.0           | 0.0           | 0.1           |
| 0.1           | 0.0           | 0.0          | 0.0           | 0.0          | 0.3           | 0.3           | 0.2           |
| 0.1           | 0.0           | 0.0          | 0.2           | 0.1          | 0.2           | 0.2           | 0.0           |
| <b>1254.6</b> | <b>6838.6</b> | <b>822.3</b> | <b>7399.0</b> | <b>553.3</b> | <b>7634.1</b> | <b>1577.0</b> | <b>7297.1</b> |
|               |               |              |               |              |               |               |               |
| 0.0           | 0.0           | 0.0          | 0.0           | 0.0          | 0.0           | 0.0           | 0.0           |
| 0.0           | 0.0           | 0.0          | 0.0           | 0.0          | 0.0           | 0.0           | 0.0           |
| 0.0           | 0.0           | 0.0          | 0.0           | 0.0          | 0.0           | 0.0           | 0.0           |
| 0.3           | 0.3           | 0.3          | 0.0           | 0.0          | 0.0           | 0.0           | 0.0           |
| 1.0           | 1.1           | 1.3          | 0.8           | 0.9          | 0.3           | 0.7           | 0.6           |
| <b>0.9</b>    | <b>1.4</b>    | <b>1.6</b>   | <b>0.8</b>    | <b>0.9</b>   | <b>0.3</b>    | <b>0.7</b>    | <b>0.6</b>    |
|               |               |              |               |              |               |               |               |
| 0.2           | 0.1           | 0.2          | 0.2           | 0.3          | 0.0           | 0.0           | 0.1           |
| 0.2           | 0.1           | 0.2          | 0.0           | 0.0          | 0.1           | 0.2           | 0.0           |
| 0.5           | 0.0           | 0.0          | 0.3           | 0.4          | 0.0           | 0.0           | 0.3           |
| 4.8           | 35.6          | 3.9          | 29.3          | 5.7          | 33.3          | 9.6           | 36.0          |
| 0.5           | 0.0           | 0.0          | 0.6           | 1.0          | 0.8           | 1.6           | 0.3           |
| 4.0           | 14.8          | 1.5          | 17.0          | 2.6          | 18.6          | 4.5           | 16.3          |
| 5.6           | 27.2          | 4.0          | 25.4          | 5.6          | 26.8          | 4.5           | 19.3          |
| 5.7           | 61.0          | 9.3          | 66.3          | 16.7         | 67.1          | 17.9          | 64.4          |
| 9.2           | 70.5          | 5.5          | 65.6          | 5.0          | 85.0          | 21.2          | 65.2          |
| 3.8           | 37.0          | 7.1          | 34.4          | 4.0          | 41.7          | 8.2           | 31.8          |
| 0.8           | 0.0           | 0.0          | 0.0           | 0.0          | 0.1           | 0.2           | 0.4           |
| 20.4          | 92.8          | 9.8          | 83.9          | 16.3         | 95.9          | 20.6          | 94.0          |
| 14.5          | 92.6          | 18.3         | 90.8          | 13.2         | 96.2          | 30.8          | 83.9          |
| 10.5          | 89.1          | 7.6          | 95.7          | 10.4         | 91.9          | 23.9          | 86.1          |
| 2.2           | 25.2          | 4.2          | 28.5          | 6.2          | 27.3          | 3.2           | 29.8          |
| 1.8           | 17.9          | 2.7          | 18.9          | 2.9          | 19.2          | 6.3           | 20.4          |
| 2.1           | 8.6           | 1.5          | 7.8           | 4.1          | 13.3          | 5.3           | 6.8           |
| 1.6           | 6.0           | 2.9          | 6.5           | 2.1          | 7.2           | 2.5           | 7.1           |
| 17.5          | 99.4          | 11.5         | 106.6         | 8.7          | 122.9         | 26.3          | 108.4         |
| 8.1           | 54.2          | 11.3         | 63.1          | 7.4          | 65.6          | 18.2          | 56.8          |

|              |              |             |              |             |              |              |              |
|--------------|--------------|-------------|--------------|-------------|--------------|--------------|--------------|
| 8.0          | 41.8         | 7.8         | 48.0         | 9.7         | 47.6         | 11.3         | 48.0         |
| 0.3          | 0.6          | 0.7         | 2.8          | 2.4         | 4.4          | 2.9          | 1.5          |
| 0.8          | 6.8          | 2.1         | 5.9          | 1.7         | 8.2          | 1.3          | 6.0          |
| <b>101.7</b> | <b>803.4</b> | <b>93.3</b> | <b>820.8</b> | <b>93.4</b> | <b>899.7</b> | <b>203.1</b> | <b>804.7</b> |
|              |              |             |              |             |              |              |              |
| 0.0          | 0.0          | 0.0         | 0.0          | 0.0         | 0.0          | 0.0          | 0.0          |
| 0.1          | 0.1          | 0.1         | 0.0          | 0.0         | 0.0          | 0.1          | 0.1          |
| 1.3          | 1.8          | 0.5         | 0.6          | 0.2         | 0.7          | 0.5          | 0.7          |
| 2.5          | 14.1         | 1.1         | 13.7         | 0.7         | 16.3         | 5.3          | 14.9         |
| 0.0          | 0.0          | 0.0         | 0.0          | 0.1         | 0.0          | 0.0          | 0.0          |
| 0.2          | 0.2          | 0.1         | 0.3          | 0.3         | 0.2          | 0.2          | 0.1          |
| 17.0         | 88.9         | 6.9         | 91.2         | 5.2         | 98.7         | 19.4         | 97.1         |
| 0.0          | 0.0          | 0.0         | 0.0          | 0.0         | 0.0          | 0.0          | 0.0          |
| 0.8          | 2.6          | 1.3         | 1.6          | 0.6         | 2.4          | 0.9          | 2.1          |
| 0.6          | 3.1          | 0.8         | 1.9          | 0.6         | 2.6          | 0.4          | 3.2          |
| 1.2          | 8.3          | 1.6         | 6.3          | 1.7         | 7.7          | 2.6          | 7.9          |
| 6.5          | 23.6         | 1.7         | 26.6         | 2.1         | 31.9         | 6.7          | 28.1         |
| 60.5         | 265.3        | 27.6        | 260.1        | 23.7        | 301.2        | 72.4         | 283.5        |
| 0.0          | 0.0          | 0.0         | 0.0          | 0.0         | 0.0          | 0.0          | 0.5          |
| 0.4          | 0.6          | 0.2         | 0.3          | 0.2         | 0.4          | 0.3          | 0.4          |
| 0.0          | 0.0          | 0.0         | 0.0          | 0.0         | 0.0          | 0.0          | 0.0          |
| 0.0          | 0.0          | 0.0         | 0.0          | 0.0         | 0.0          | 0.0          | 0.0          |
| 0.3          | 0.4          | 0.5         | 0.1          | 0.2         | 0.1          | 0.1          | 0.2          |
| 0.7          | 0.7          | 0.4         | 0.3          | 0.3         | 0.4          | 0.1          | 0.4          |
| 2.9          | 7.7          | 1.1         | 5.4          | 1.4         | 6.3          | 2.0          | 6.5          |
| 0.5          | 0.4          | 0.5         | 0.3          | 0.4         | 0.4          | 0.2          | 0.1          |
| 0.2          | 1.4          | 0.3         | 1.0          | 0.3         | 1.2          | 0.6          | 0.8          |
|              | <b>419.2</b> |             | <b>409.8</b> |             | <b>470.5</b> |              | <b>446.4</b> |
|              |              |             |              |             |              |              |              |
| 0.0          | 0.0          | 0.0         | 0.2          | 0.1         | 0.0          | 0.0          | 0.0          |
| 0.1          | 0.0          | 0.0         | 0.2          | 0.1         | 1.2          | 1.4          | 0.1          |
| 0.0          | 0.0          | 0.0         | 0.0          | 0.1         | 0.0          | 0.0          | 0.0          |
| 0.2          | 0.4          | 0.2         | 0.2          | 0.2         | 0.3          | 0.3          | 0.3          |
| 0.0          | 0.0          | 0.0         | 0.1          | 0.0         | 0.0          | 0.1          | 0.0          |
| 0.1          | 0.3          | 0.2         | 0.1          | 0.1         | 0.2          | 0.1          | 0.2          |
| 5.4          | 15.1         | 2.2         | 13.1         | 0.8         | 16.4         | 4.7          | 15.5         |
| 0.4          | 0.2          | 0.3         | 0.0          | 0.1         | 0.2          | 0.2          | 0.2          |
| 0.0          | 0.1          | 0.1         | 0.1          | 0.0         | 0.1          | 0.1          | 0.0          |
| 0.7          | 1.3          | 0.4         | 1.3          | 0.5         | 1.5          | 0.8          | 1.6          |
| 0.5          | 0.7          | 0.4         | 0.8          | 0.4         | 0.8          | 0.3          | 0.8          |
| 0.3          | 0.2          | 0.2         | 0.2          | 0.2         | 0.1          | 0.1          | 0.1          |

|              |              |             |              |             |               |              |              |
|--------------|--------------|-------------|--------------|-------------|---------------|--------------|--------------|
| 9.9          | 30.7         | 2.2         | 29.5         | 1.3         | 35.2          | 9.9          | 34.7         |
| 34.2         | 129.4        | 10.0        | 122.7        | 5.7         | 145.7         | 44.3         | 140.2        |
| 0.0          | 0.0          | 0.0         | 0.0          | 0.0         | 0.0           | 0.0          | 0.0          |
| 0.1          | 0.1          | 0.1         | 0.1          | 0.1         | 0.2           | 0.2          | 0.1          |
| 0.0          | 0.0          | 0.0         | 0.0          | 0.1         | 0.1           | 0.1          | 0.0          |
| 0.0          | 0.0          | 0.0         | 0.0          | 0.0         | 0.0           | 0.0          | 0.0          |
| 0.1          | 0.1          | 0.1         | 0.0          | 0.0         | 0.0           | 0.1          | 0.0          |
| 0.1          | 0.2          | 0.1         | 0.3          | 0.2         | 0.2           | 0.2          | 0.2          |
| 0.9          | 2.3          | 0.7         | 1.4          | 0.6         | 0.8           | 0.2          | 1.6          |
| 1.7          | 2.0          | 0.8         | 2.1          | 0.6         | 2.8           | 1.0          | 2.5          |
| 9.5          | 32.0         | 3.1         | 31.4         | 1.3         | 35.6          | 10.4         | 36.5         |
| 1.1          | 2.2          | 1.6         | 0.8          | 0.8         | 4.1           | 1.2          | 2.6          |
| 1.9          | 5.9          | 1.1         | 5.5          | 0.7         | 5.5           | 1.1          | 6.3          |
| 3.3          | 14.6         | 1.2         | 15.0         | 4.0         | 20.5          | 7.4          | 18.5         |
| 0.0          | 0.0          | 0.0         | 0.0          | 0.0         | 0.0           | 0.0          | 0.0          |
| 0.1          | 0.0          | 0.1         | 0.1          | 0.2         | 0.0           | 0.0          | 0.0          |
| 0.0          | 0.0          | 0.0         | 0.0          | 0.0         | 0.0           | 0.1          | 0.0          |
| 0.2          | 0.0          | 0.0         | 0.1          | 0.1         | 0.0           | 0.0          | 0.0          |
| 0.4          | 0.9          | 0.4         | 0.2          | 0.5         | 0.3           | 0.3          | 0.6          |
| 2.0          | 8.1          | 0.7         | 10.4         | 2.0         | 9.7           | 2.3          | 7.0          |
| 118.2        | 503.1        | 69.2        | 482.1        | 46.8        | 601.5         | 162.4        | 533.7        |
| 5.1          | 12.7         | 2.9         | 10.1         | 3.7         | 15.9          | 4.9          | 10.4         |
| 19.0         | 84.1         | 6.2         | 79.4         | 6.8         | 102.4         | 31.1         | 84.8         |
| 0.7          | 0.7          | 1.3         | 0.0          | 0.0         | 0.0           | 0.0          | 0.0          |
| 2.4          | 13.1         | 4.1         | 14.5         | 4.2         | 13.2          | 8.2          | 17.8         |
| 1.9          | 12.5         | 1.3         | 11.0         | 2.6         | 13.1          | 7.8          | 15.3         |
| 0.0          | 0.0          | 0.0         | 0.0          | 0.0         | 0.0           | 0.0          | 0.8          |
| 19.0         | 0.0          | 0.0         | 0.0          | 0.0         | 0.0           | 0.0          | 0.0          |
| 0.0          | 0.0          | 0.0         | 0.0          | 0.0         | 0.0           | 0.0          | 0.0          |
| 0.0          | 0.0          | 0.0         | 0.0          | 0.0         | 0.0           | 0.0          | 0.0          |
| 0.0          | 0.0          | 0.0         | 0.0          | 0.0         | 0.0           | 0.0          | 0.1          |
| 0.0          | 0.0          | 0.0         | 0.0          | 0.0         | 0.0           | 0.0          | 0.0          |
| 0.1          | 0.0          | 0.0         | 0.0          | 0.0         | 0.0           | 0.0          | 0.0          |
| 0.0          | 0.0          | 0.0         | 0.0          | 0.0         | 0.0           | 0.0          | 0.0          |
| 0.2          | 0.1          | 0.1         | 0.0          | 0.0         | 0.5           | 0.4          | 0.4          |
| <b>222.2</b> | <b>872.9</b> | <b>96.5</b> | <b>833.1</b> | <b>53.6</b> | <b>1027.9</b> | <b>280.7</b> | <b>932.9</b> |
|              |              |             |              |             |               |              |              |
| 0.5          | 0.5          | 0.2         | 0.1          | 0.1         | 0.6           | 0.4          | 0.3          |
| 1.1          | 2.6          | 1.4         | 0.5          | 0.4         | 2.4           | 1.0          | 0.6          |
| 0.0          | 0.0          | 0.0         | 0.0          | 0.0         | 0.0           | 0.0          | 0.0          |
| 0.7          | 0.6          | 0.4         | 0.4          | 0.6         | 0.3           | 0.4          | 0.4          |

|             |              |             |              |            |              |             |              |
|-------------|--------------|-------------|--------------|------------|--------------|-------------|--------------|
| 7.2         | 21.0         | 2.9         | 11.6         | 1.8        | 18.9         | 6.8         | 15.6         |
| 1.1         | 1.1          | 0.5         | 0.4          | 0.5        | 1.3          | 0.7         | 0.7          |
| 0.2         | 0.1          | 0.1         | 0.0          | 0.0        | 0.0          | 0.0         | 0.1          |
| 2.5         | 4.6          | 1.2         | 1.0          | 0.3        | 4.2          | 2.4         | 2.0          |
| 0.0         | 0.1          | 0.3         | 0.0          | 0.0        | 0.0          | 0.1         | 0.0          |
| 0.3         | 0.1          | 0.1         | 0.0          | 0.1        | 0.0          | 0.0         | 0.0          |
| 1.6         | 2.1          | 1.3         | 0.8          | 0.8        | 1.8          | 0.8         | 1.5          |
| 0.1         | 0.0          | 0.0         | 0.0          | 0.0        | 0.1          | 0.3         | 0.1          |
| 0.1         | 0.2          | 0.5         | 0.1          | 0.1        | 0.1          | 0.2         | 0.0          |
| 0.0         | 0.0          | 0.0         | 0.0          | 0.0        | 0.0          | 0.0         | 0.5          |
| 0.7         | 0.5          | 0.5         | 0.2          | 0.3        | 0.2          | 0.3         | 0.7          |
| 0.4         | 0.0          | 0.0         | 0.0          | 0.0        | 0.1          | 0.3         | 0.0          |
| <b>13.1</b> | <b>33.6</b>  | <b>6.4</b>  | <b>15.0</b>  | <b>3.0</b> | <b>30.2</b>  | <b>10.4</b> | <b>22.5</b>  |
|             |              |             |              |            |              |             |              |
| <b>2324</b> | <b>14688</b> | <b>1642</b> | <b>15627</b> | <b>708</b> | <b>16646</b> | <b>3594</b> | <b>16157</b> |



as mean  $\pm$  SD and N = 4.

| stdev       | SI-NAE 16:0 | stdev       |
|-------------|-------------|-------------|
| 0.4         | 0.3         | 0.3         |
| 7.9         | 45.1        | 8.1         |
| 0.0         | 0.0         | 0.0         |
| 0.1         | 1.0         | 0.4         |
| 3.2         | 21.3        | 5.1         |
| 2.5         | 18.7        | 2.6         |
| 0.0         | 0.0         | 0.0         |
| 0.9         | 3.3         | 0.5         |
| 0.1         | 0.0         | 0.0         |
| 0.1         | 0.0         | 0.0         |
| 0.2         | 1.0         | 0.7         |
| 0.6         | 0.1         | 0.2         |
| 1.0         | 2.5         | 0.5         |
| 0.1         | 0.1         | 0.1         |
| <b>15.9</b> | <b>93.4</b> | <b>17.8</b> |
|             |             |             |
| 0.3         | 0.3         | 0.1         |
| 6.4         | 23.5        | 3.6         |
| 6.0         | 52.6        | 9.1         |
| 184.0       | 1049.1      | 131.0       |
| 0.2         | 0.4         | 0.1         |
| 0.3         | 1.5         | 0.3         |
| 6.8         | 72.9        | 8.5         |
| 350.2       | 1415.6      | 184.6       |
| 27.6        | 146.8       | 28.1        |
| 0.2         | 0.5         | 0.2         |
| 0.5         | 1.7         | 0.5         |
| 50.5        | 313.4       | 44.0        |
| 2.2         | 3.2         | 2.5         |
| 25.2        | 154.4       | 23.2        |
| 114.8       | 596.4       | 83.0        |
| 41.8        | 204.3       | 33.1        |
| 7.9         | 61.7        | 7.6         |
| 62.2        | 273.5       | 43.4        |
| 0.0         | 0.0         | 0.0         |
| 2.8         | 9.5         | 4.1         |
| 6.9         | 16.4        | 4.0         |
| 1.1         | 11.1        | 3.0         |
| 0.5         | 4.5         | 0.8         |

|              |               |              |
|--------------|---------------|--------------|
| 10.1         | 43.1          | 8.0          |
| 22.0         | 114.1         | 16.5         |
| 1.1          | 13.7          | 3.6          |
| 7.7          | 34.6          | 5.1          |
| 0.6          | 1.9           | 1.2          |
| 3.8          | 7.6           | 1.7          |
| 0.1          | 0.3           | 0.2          |
| 1.2          | 4.6           | 0.7          |
| 1.1          | 3.7           | 1.4          |
| 2.3          | 8.2           | 2.0          |
| 1.4          | 4.3           | 0.8          |
| 0.4          | 1.2           | 0.5          |
| 1.3          | 4.4           | 1.0          |
| 1.1          | 5.5           | 1.4          |
| 1.2          | 4.7           | 0.8          |
| 7.1          | 13.6          | 2.5          |
| 0.9          | 4.1           | 0.6          |
| 0.3          | 0.6           | 0.3          |
| 0.6          | 1.7           | 0.3          |
| 0.2          | 1.1           | 0.5          |
| 0.7          | 3.6           | 0.6          |
| 0.0          | 0.1           | 0.1          |
| 0.3          | 0.5           | 0.1          |
| 1.2          | 3.8           | 0.4          |
| 0.4          | 1.6           | 0.4          |
| 0.3          | 0.9           | 0.3          |
| 1.4          | 2.8           | 0.6          |
| <b>939.5</b> | <b>4699.6</b> | <b>616.6</b> |
|              |               |              |
| 0.3          | 1.3           | 0.2          |
| 4.2          | 36.8          | 2.7          |
| 15.4         | 67.7          | 10.8         |
| 90.6         | 633.1         | 95.6         |
| 17.8         | 25.4          | 6.0          |
| 0.0          | 0.0           | 0.0          |
| 37.4         | 154.9         | 39.8         |
| 11.6         | 16.7          | 6.4          |
| <b>156.4</b> | <b>935.9</b>  | <b>134.3</b> |
|              |               |              |
| 0.1          | 0.1           | 0.1          |
| 0.1          | 0.4           | 0.1          |

|             |              |             |
|-------------|--------------|-------------|
| 1.8         | 13.1         | 1.5         |
| 4.5         | 20.1         | 2.5         |
| 0.1         | 0.1          | 0.0         |
| 0.1         | 0.8          | 0.2         |
| 3.5         | 16.7         | 1.5         |
| 20.6        | 99.8         | 11.4        |
| 1.0         | 7.5          | 1.0         |
| 1.5         | 6.4          | 0.5         |
| 1.9         | 9.0          | 1.7         |
| 4.0         | 19.5         | 3.8         |
| 5.7         | 26.8         | 3.5         |
| 3.6         | 1.1          | 0.7         |
| 0.8         | 7.1          | 1.7         |
| 0.5         | 2.0          | 0.5         |
| 0.7         | 4.2          | 1.2         |
| 0.6         | 1.1          | 0.5         |
| 1.4         | 4.6          | 1.1         |
| 0.8         | 4.1          | 0.6         |
| 1.0         | 1.7          | 0.2         |
| 0.7         | 1.5          | 0.4         |
| 0.5         | 1.6          | 0.2         |
| 0.3         | 1.8          | 0.6         |
| 0.6         | 0.4          | 0.2         |
| 0.5         | 1.3          | 0.4         |
| <b>51.7</b> | <b>252.7</b> | <b>30.7</b> |
|             |              |             |
| 0.1         | 0.1          | 0.1         |
| 1.0         | 6.5          | 1.5         |
| 0.0         | 0.0          | 0.0         |
| 0.1         | 0.3          | 0.1         |
| 5.5         | 21.8         | 3.8         |
| 0.0         | 0.0          | 0.0         |
| 2.1         | 5.0          | 1.7         |
| 0.4         | 0.4          | 0.5         |
| 0.2         | 0.2          | 0.2         |
| 1.0         | 6.8          | 1.5         |
| 0.1         | 0.1          | 0.2         |
| 1.9         | 12.5         | 1.8         |
| 0.1         | 0.6          | 0.4         |
| <b>10.7</b> | <b>54.3</b>  | <b>9.4</b>  |
|             |              |             |

|       |        |       |
|-------|--------|-------|
| 0.0   | 0.0    | 0.0   |
| 0.2   | 0.0    | 0.0   |
| 0.0   | 0.0    | 0.0   |
| 0.2   | 0.0    | 0.0   |
| 0.0   | 0.0    | 0.0   |
| 1.3   | 1.1    | 0.9   |
| 3.8   | 3.6    | 1.0   |
| 0.0   | 0.0    | 0.0   |
| 0.2   | 0.2    | 0.4   |
| 1.1   | 8.5    | 1.3   |
| 60.0  | 187.4  | 36.8  |
| 3.1   | 14.0   | 4.7   |
| 0.0   | 0.1    | 0.2   |
| 1.7   | 1.7    | 1.0   |
| 68.4  | 197.6  | 31.5  |
| 5.0   | 8.6    | 1.5   |
| 115.3 | 300.8  | 47.3  |
| 123.0 | 367.4  | 65.1  |
| 7.8   | 37.6   | 12.8  |
| 201.8 | 632.7  | 92.0  |
| 95.8  | 258.2  | 42.8  |
| 438.1 | 1612.5 | 290.7 |
| 11.9  | 15.7   | 12.7  |
| 14.4  | 42.5   | 11.9  |
| 22.1  | 61.6   | 13.9  |
| 30.7  | 145.3  | 21.2  |
| 2.8   | 14.8   | 2.7   |
| 76.3  | 199.0  | 34.2  |
| 773.2 | 2473.3 | 386.6 |
| 27.8  | 115.8  | 17.1  |
| 125.0 | 453.7  | 75.2  |
| 3.1   | 0.0    | 0.0   |
| 6.4   | 10.7   | 2.6   |
| 5.1   | 13.3   | 2.2   |
| 2.5   | 13.2   | 3.1   |
| 4.8   | 14.8   | 4.7   |
| 3.2   | 10.7   | 1.8   |
| 3.0   | 4.2    | 2.5   |
| 3.9   | 14.1   | 2.9   |
| 5.9   | 18.1   | 3.7   |
| 0.0   | 0.0    | 0.0   |

|               |               |               |
|---------------|---------------|---------------|
| 1.0           | 1.4           | 1.0           |
| 4.1           | 15.2          | 3.7           |
| 3.1           | 3.6           | 0.7           |
| 15.6          | 43.3          | 4.5           |
| 1.0           | 0.0           | 0.0           |
| 0.9           | 1.7           | 1.4           |
| 0.3           | 0.2           | 0.2           |
| 0.0           | 0.0           | 0.1           |
| 0.2           | 0.0           | 0.1           |
| 0.2           | 0.1           | 0.2           |
| 0.3           | 0.1           | 0.2           |
| 0.0           | 0.0           | 0.0           |
| <b>2214.3</b> | <b>7318.6</b> | <b>1178.2</b> |
|               |               |               |
| 0.0           | 0.0           | 0.0           |
| 0.0           | 0.0           | 0.0           |
| 0.0           | 0.0           | 0.0           |
| 0.0           | 0.0           | 0.0           |
| 1.2           | 0.6           | 1.2           |
| <b>1.2</b>    | <b>0.6</b>    | <b>1.2</b>    |
|               |               |               |
| 0.2           | 0.0           | 0.0           |
| 0.0           | 0.3           | 0.4           |
| 0.2           | 0.0           | 0.0           |
| 13.8          | 33.5          | 5.6           |
| 0.6           | 0.2           | 0.4           |
| 3.0           | 20.1          | 3.2           |
| 2.3           | 21.9          | 6.7           |
| 20.2          | 61.7          | 13.0          |
| 16.8          | 76.6          | 12.4          |
| 9.3           | 37.6          | 7.7           |
| 0.9           | 0.3           | 0.4           |
| 29.0          | 91.1          | 10.5          |
| 20.8          | 90.8          | 21.7          |
| 24.0          | 90.8          | 7.2           |
| 7.3           | 30.9          | 6.7           |
| 7.7           | 18.2          | 3.4           |
| 1.6           | 10.0          | 3.0           |
| 3.0           | 6.9           | 3.2           |
| 28.3          | 108.8         | 14.6          |
| 14.8          | 56.6          | 8.0           |

|              |              |              |
|--------------|--------------|--------------|
| 17.3         | 48.1         | 7.3          |
| 1.1          | 1.8          | 1.7          |
| 1.2          | 9.9          | 4.1          |
| <b>207.4</b> | <b>837.9</b> | <b>109.2</b> |
|              |              |              |
| 0.0          | 0.0          | 0.0          |
| 0.1          | 0.0          | 0.0          |
| 0.6          | 0.4          | 0.4          |
| 3.5          | 13.1         | 4.4          |
| 0.0          | 0.0          | 0.0          |
| 0.1          | 0.4          | 0.2          |
| 18.8         | 85.0         | 12.4         |
| 0.0          | 0.0          | 0.0          |
| 0.6          | 1.2          | 0.9          |
| 1.1          | 2.5          | 0.9          |
| 2.2          | 6.2          | 0.3          |
| 6.3          | 23.8         | 3.6          |
| 51.2         | 252.5        | 36.9         |
| 1.0          | 0.0          | 0.0          |
| 0.2          | 0.3          | 0.5          |
| 0.0          | 0.0          | 0.0          |
| 0.0          | 0.0          | 0.0          |
| 0.1          | 0.2          | 0.1          |
| 0.3          | 0.3          | 0.3          |
| 1.0          | 6.1          | 0.8          |
| 0.2          | 0.4          | 0.4          |
| 0.1          | 0.7          | 0.5          |
|              | <b>393.0</b> |              |
|              |              |              |
| 0.1          | 0.0          | 0.0          |
| 0.0          | 0.1          | 0.1          |
| 0.0          | 0.0          | 0.0          |
| 0.2          | 0.3          | 0.3          |
| 0.0          | 0.0          | 0.0          |
| 0.1          | 0.1          | 0.0          |
| 3.2          | 14.7         | 2.4          |
| 0.2          | 0.0          | 0.0          |
| 0.1          | 0.0          | 0.0          |
| 0.8          | 1.6          | 0.7          |
| 0.3          | 0.6          | 0.1          |
| 0.0          | 0.1          | 0.3          |

|              |              |              |
|--------------|--------------|--------------|
| 6.6          | 29.2         | 2.7          |
| 27.1         | 125.8        | 16.0         |
| 0.0          | 0.0          | 0.0          |
| 0.1          | 0.1          | 0.2          |
| 0.1          | 0.0          | 0.0          |
| 0.0          | 0.0          | 0.0          |
| 0.0          | 0.0          | 0.0          |
| 0.1          | 0.2          | 0.0          |
| 0.8          | 1.3          | 0.2          |
| 0.9          | 2.6          | 0.2          |
| 6.1          | 30.8         | 3.5          |
| 0.5          | 2.5          | 1.1          |
| 1.9          | 5.4          | 2.0          |
| 6.1          | 15.9         | 3.6          |
| 0.0          | 0.1          | 0.1          |
| 0.0          | 0.0          | 0.1          |
| 0.0          | 0.0          | 0.0          |
| 0.1          | 0.0          | 0.0          |
| 0.4          | 0.3          | 0.2          |
| 1.8          | 8.8          | 2.6          |
| 93.7         | 492.4        | 63.8         |
| 7.2          | 10.4         | 5.0          |
| 17.9         | 71.9         | 10.9         |
| 0.0          | 0.5          | 0.9          |
| 7.1          | 14.7         | 6.7          |
| 1.7          | 13.0         | 2.4          |
| 1.6          | 0.0          | 0.0          |
| 0.0          | 0.0          | 0.0          |
| 0.0          | 0.0          | 0.0          |
| 0.0          | 0.0          | 0.0          |
| 0.3          | 0.1          | 0.2          |
| 0.0          | 0.0          | 0.0          |
| 0.0          | 0.0          | 0.0          |
| 0.0          | 0.0          | 0.0          |
| 0.3          | 0.2          | 0.2          |
| <b>164.4</b> | <b>843.6</b> | <b>110.1</b> |
|              |              |              |
| 0.4          | 0.2          | 0.2          |
| 0.4          | 0.8          | 0.5          |
| 0.0          | 0.0          | 0.0          |
| 0.2          | 0.3          | 0.1          |

|             |              |             |
|-------------|--------------|-------------|
| 3.3         | 14.0         | 1.1         |
| 0.9         | 0.7          | 0.6         |
| 0.2         | 0.0          | 0.0         |
| 1.3         | 2.8          | 0.4         |
| 0.1         | 0.0          | 0.0         |
| 0.0         | 0.0          | 0.0         |
| 2.0         | 1.0          | 0.8         |
| 0.1         | 0.0          | 0.1         |
| 0.0         | 0.2          | 0.4         |
| 1.0         | 0.0          | 0.0         |
| 0.8         | 0.2          | 0.3         |
| 0.0         | 0.0          | 0.0         |
| <b>6.5</b>  | <b>20.4</b>  | <b>1.0</b>  |
|             |              |             |
| <b>3513</b> | <b>15449</b> | <b>2189</b> |
